# Supplementary figures and images for: A general, robust framework for determining the key species that forewarns sudden transitions in biological circuits
Source: Royal Society of Chemistry journal article supplement (doi:10.1039/d4cp04863f), 2025-01-01

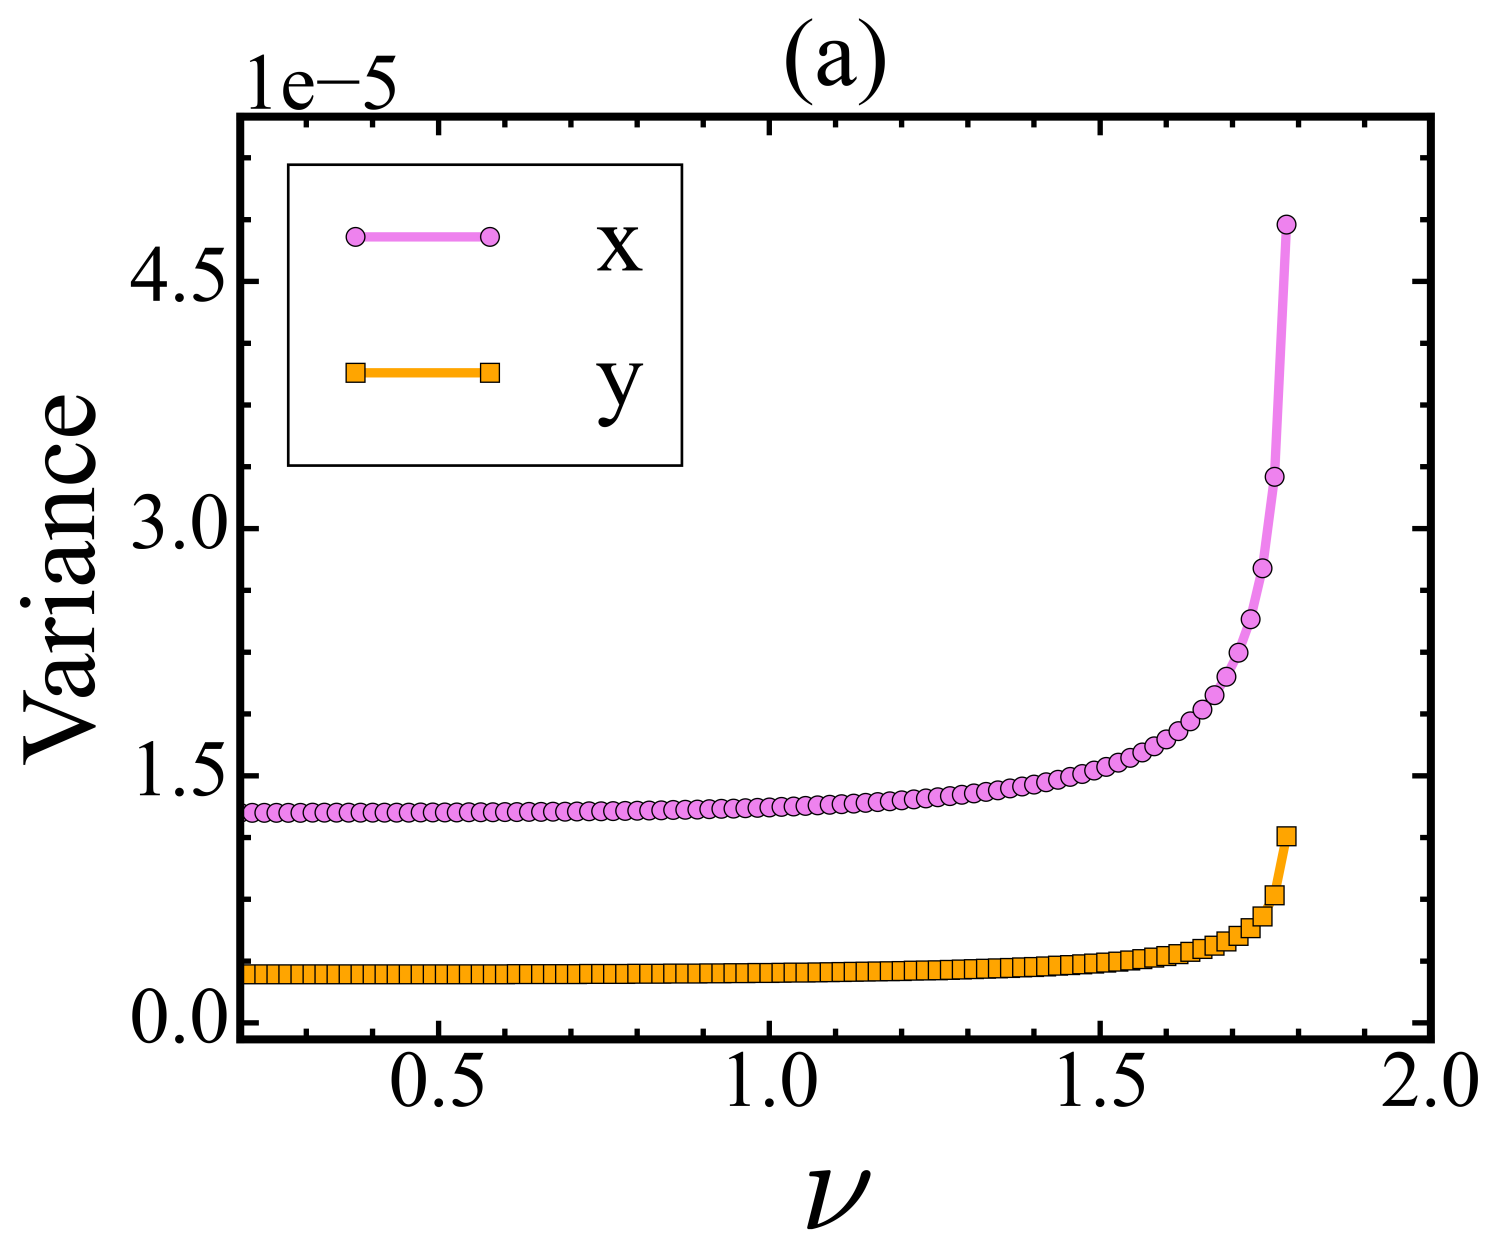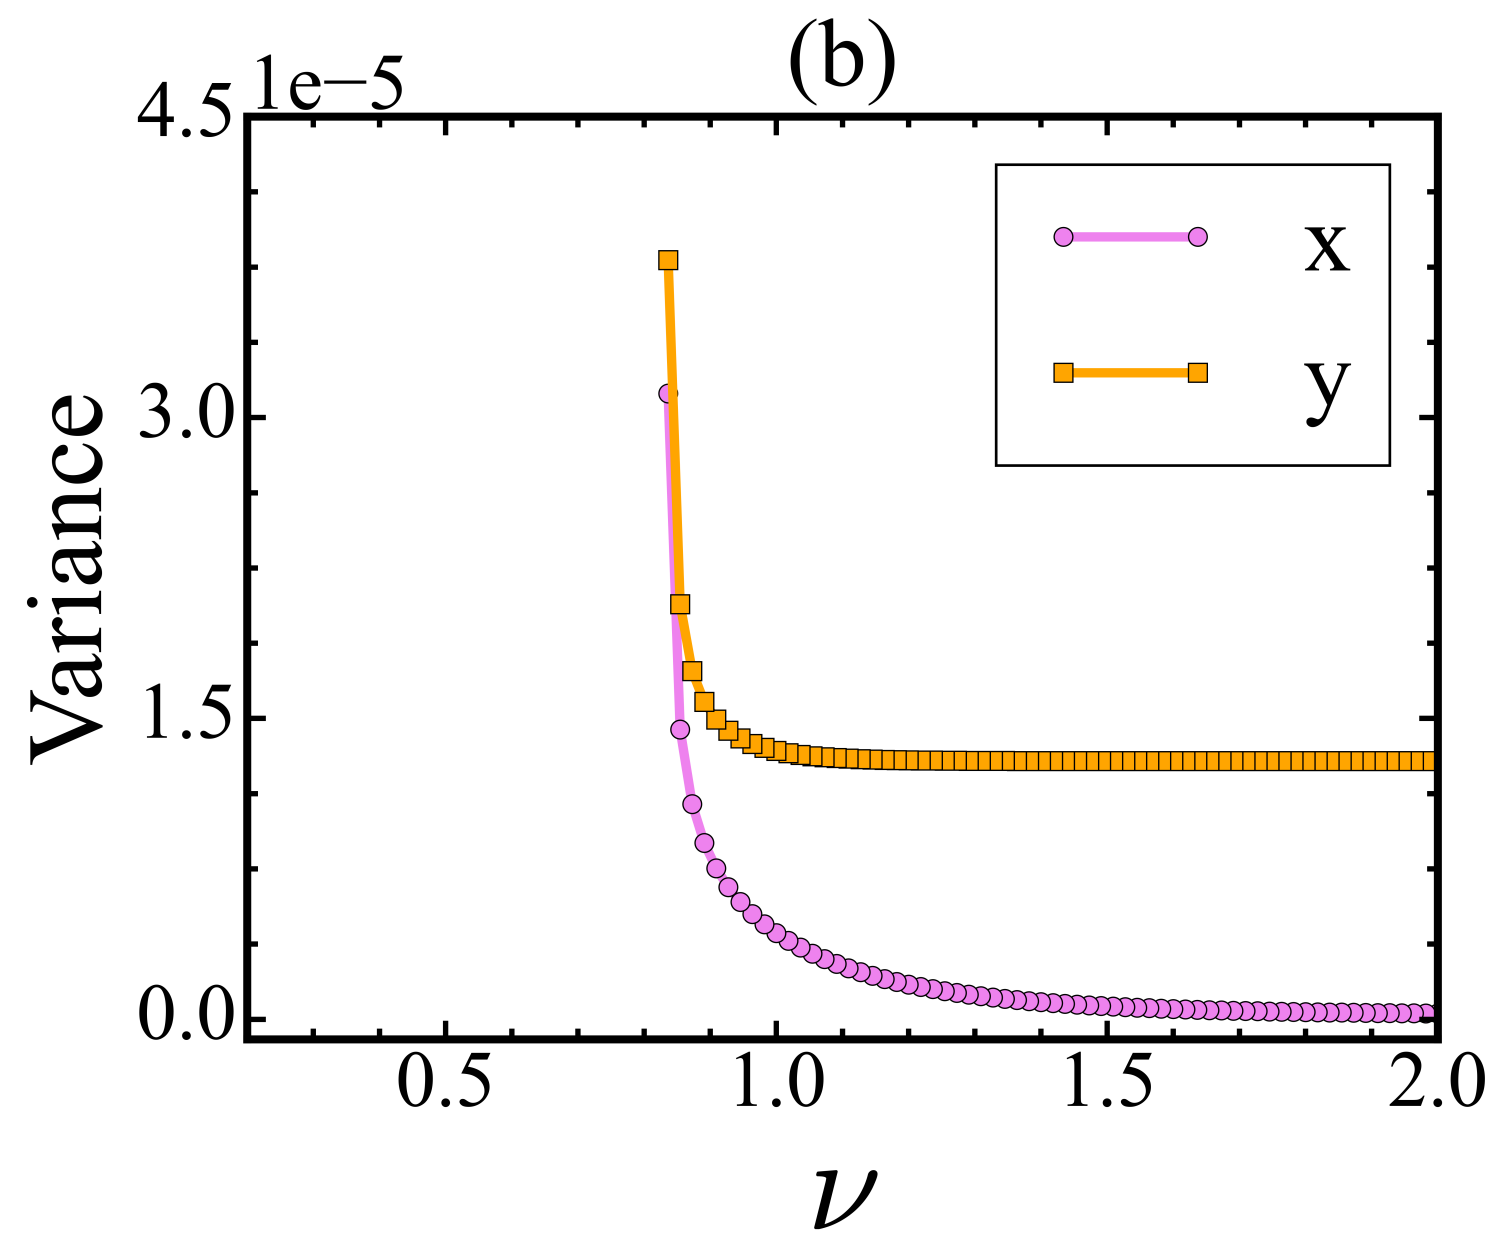

Supplement: d4cp04863f2.zip [file d4cp04863f2.zip]
